# Supplementary material for: A framework for significance analysis of gene expression data using dimension reduction methods
Source: PubMed Central journal article supplement (PMC2194745; doi:10.1186/1471-2105-8-346), 2007-09-18
Supplement: 1471-2105-8-346-S3.pdf [file 1471-2105-8-346-S3.pdf]

## Response surfaces for optimisation of $\gamma$ and $A$

The explained  $\mathbf{Y}$ -variances for the data sets used in the manuscript, as estimated by a leave-one-out cross-validation. Results for both Bridge-PLSR and ordinary PLSR are given. Bridge-PLSR models are optimised for several values of the ridge-parameter  $\gamma$ , where  $\gamma = 1$  corresponds to an ordinary PCA decomposition. The optimal number of components  $A$  for prediction is estimated by requiring an improvement of two standard errors for each included component. The resulting model rank is highlighted for each model. As the optimisation of parameters was not included in an external validation, some of these results may be over-optimistic. However, as the main goal in this work was significance analysis, the optimal models for prediction was not used. The precision (the number of significant digits) of the variance estimates is arbitrary and does not reflect the uncertainty of the results.

Table 1: The explained variance for the smoker-data. The response surface is robust with regard to  $\gamma$  for small values of this parameter. Many of the Bridge-PLSR models and the PLSR model reaches a local minimum in the prediction error after one or two components

| Bridge-PLSR (% explained variance) |                |         |         |         |                |                |
|------------------------------------|----------------|---------|---------|---------|----------------|----------------|
| $\gamma$                           | $A = 1$        | $A = 2$ | $A = 3$ | $A = 4$ | $A = 5$        | $A = 6$        |
| 0                                  | <b>20.3473</b> | 17.4917 | -       | -       | -              | -              |
| 0.01                               | <b>20.3477</b> | 17.4915 | 25.9869 | 35.6092 | 38.8020        | 38.6147        |
| 0.1                                | <b>20.3349</b> | 17.4633 | 25.9750 | 35.6020 | 38.7984        | 38.6111        |
| 0.2                                | <b>20.2701</b> | 17.3553 | 25.9301 | 35.5745 | 38.7848        | 38.5975        |
| 0.3                                | <b>20.1174</b> | 17.1165 | 25.8347 | 35.5138 | 38.7547        | 38.5673        |
| 0.4                                | <b>19.8115</b> | 16.6538 | 25.6677 | 35.3969 | 38.6971        | 38.5094        |
| 0.5                                | <b>19.2248</b> | 15.7845 | 25.4276 | 35.1798 | 38.5906        | 38.4024        |
| 0.6                                | <b>18.0835</b> | 14.1127 | 25.2874 | 34.7726 | 38.3916        | 38.2025        |
| 0.7                                | 15.7390        | 18.9894 | 26.3544 | 33.9848 | <b>37.9975</b> | 37.8071        |
| 0.8                                | 10.6827        | 18.2614 | 28.5223 | 32.7304 | <b>37.1067</b> | 36.9147        |
| 0.9                                | 3.1957         | 7.5559  | 28.1377 | 31.1243 | <b>34.4112</b> | 34.2457        |
| 1                                  | 0.5503         | 0.9204  | 12.1192 | 28.6304 | 29.1400        | <b>29.4811</b> |

  

| PLSR (% explained variance) |         |                |         |         |         |         |
|-----------------------------|---------|----------------|---------|---------|---------|---------|
|                             | 20.3472 | <b>32.3844</b> | 29.3989 | 36.8339 | 42.6600 | 42.2927 |

Table 2: The explained variances for the rat-liver data. For these data, there is not much difference between the bilinear models.

| Bridge-PLSR (% explained variance) |         |         |         |                |                |                |
|------------------------------------|---------|---------|---------|----------------|----------------|----------------|
| $\gamma$                           | $A = 1$ | $A = 2$ | $A = 3$ | $A = 4$        | $A = 5$        | $A = 6$        |
| 0                                  | 28.4094 | 41.7311 | 48.5116 | <b>53.1165</b> | 53.7909        | 53.1411        |
| 0.01                               | 28.4094 | 41.7298 | 48.5093 | <b>53.1162</b> | 53.7909        | 53.1440        |
| 0.1                                | 28.4097 | 41.7153 | 48.4828 | <b>53.1126</b> | 53.7902        | 53.1756        |
| 0.2                                | 28.4101 | 41.6945 | 48.4423 | <b>53.1071</b> | 53.7890        | 53.2187        |
| 0.3                                | 28.4106 | 41.6662 | 48.3838 | <b>53.0993</b> | 53.7870        | 53.2753        |
| 0.4                                | 28.4113 | 41.6260 | 48.2949 | <b>53.0878</b> | 53.7836        | 53.3551        |
| 0.5                                | 28.4123 | 41.5652 | 48.1506 | <b>53.0698</b> | 53.7776        | 53.4820        |
| 0.6                                | 28.4137 | 41.4647 | 47.8924 | <b>53.0399</b> | 53.7663        | 53.7642        |
| 0.7                                | 28.4160 | 41.2754 | 47.3511 | <b>52.9856</b> | 53.7414        | 53.9482        |
| 0.8                                | 28.4205 | 40.8262 | 45.2238 | 52.8729        | <b>53.6647</b> | 54.0464        |
| 0.9                                | 28.4322 | 39.0808 | 43.1108 | 52.5767        | 52.5876        | <b>54.1928</b> |
| 1                                  | 28.5198 | 29.4049 | 44.0042 | <b>51.0474</b> | 50.4910        | 49.2953        |

  

| PLSR (% explained variance) |         |         |         |                |         |         |
|-----------------------------|---------|---------|---------|----------------|---------|---------|
|                             | 28.4094 | 41.7233 | 42.5152 | <b>53.0019</b> | 53.7633 | 48.3394 |
